# Supplementary material
Source: ML conference proceedings conference paper supplement (https://openreview.net/forum?id=iWSVl6mLbW)

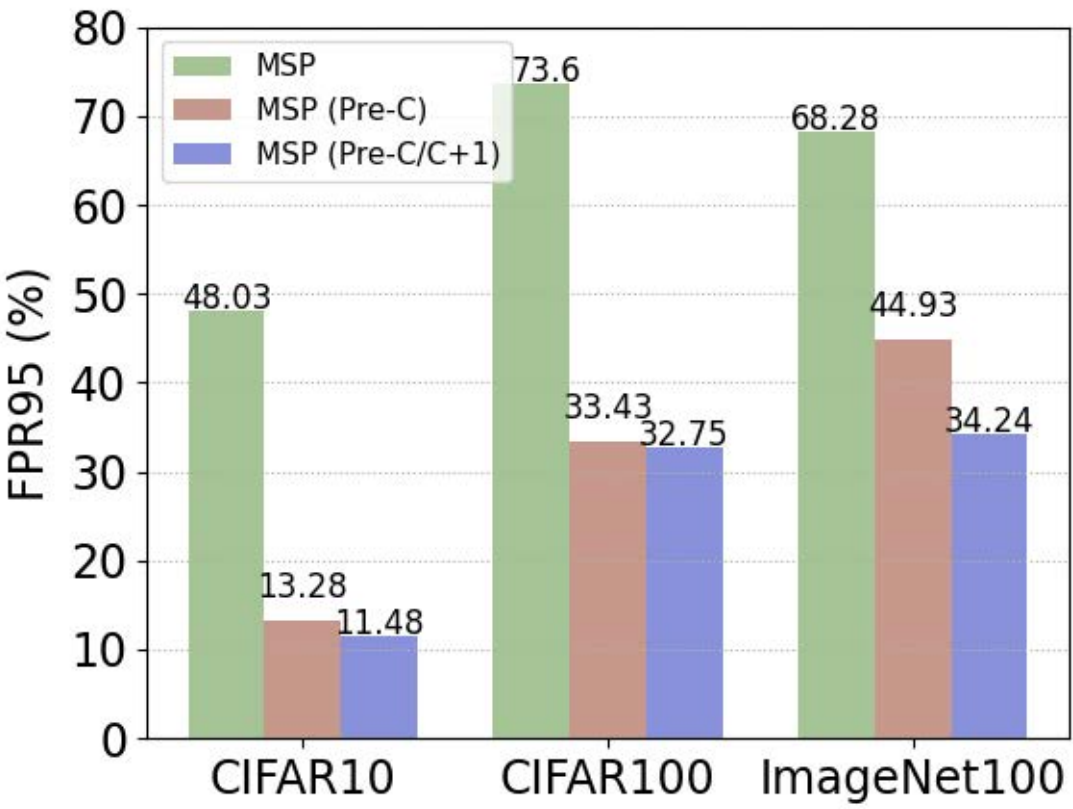

Supplement: supplementary_material [file attachment]

**Rock crab**

**Leaf beetle**

**Bow tie**

**Red wolf**

**Strawberry**

**Flowerpot**

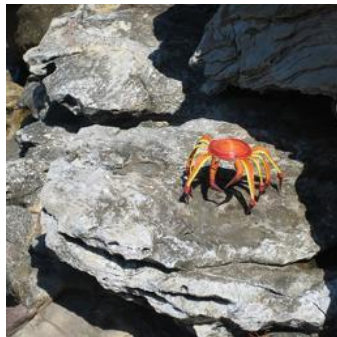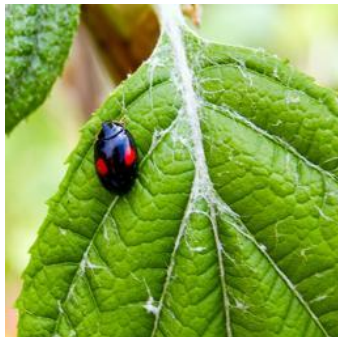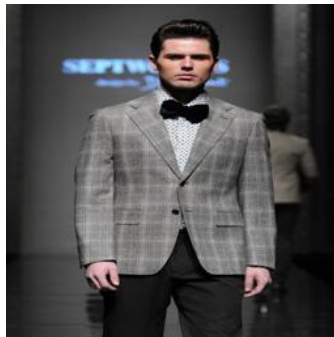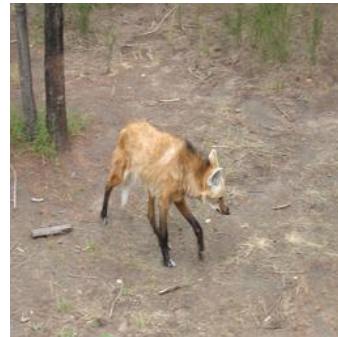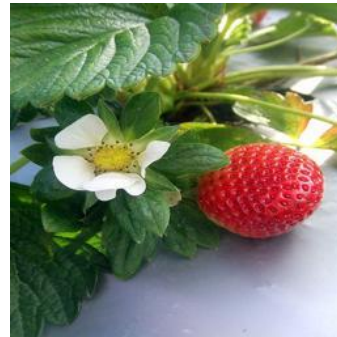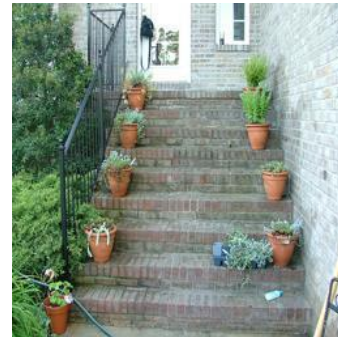

**ID images**

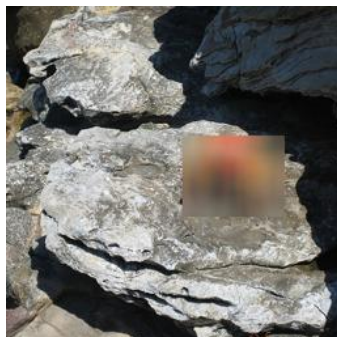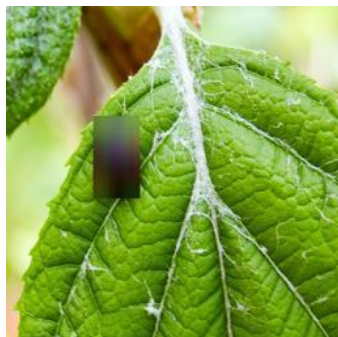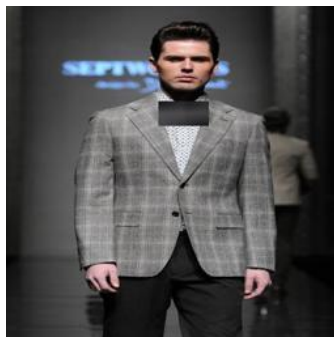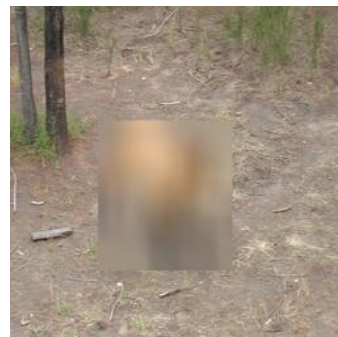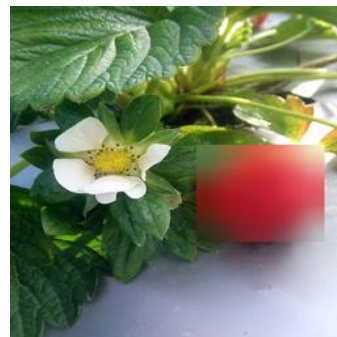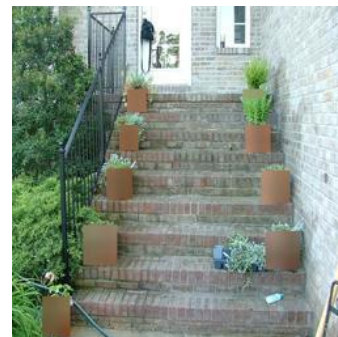

**Grounding-  
DINO+Blur**

Supplement: supplementary_material [file attachment]

**ID images**

**Fake OOD images**

**Mongoose**

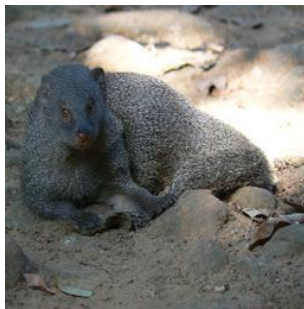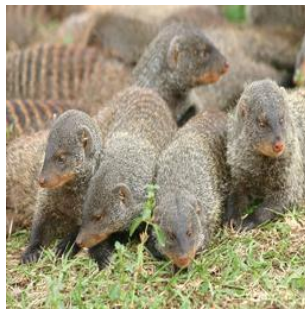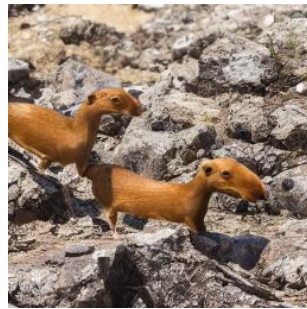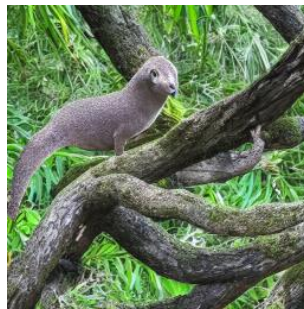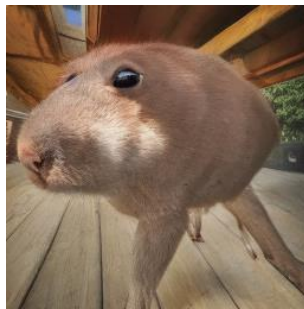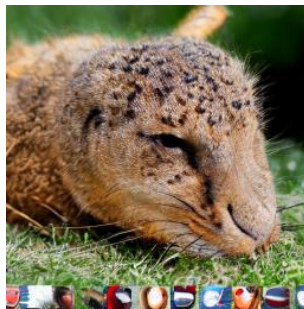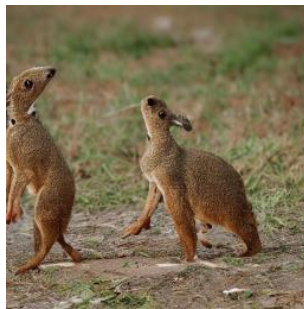

**Alligator  
lizard**

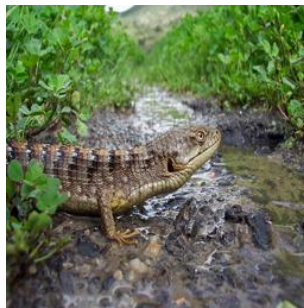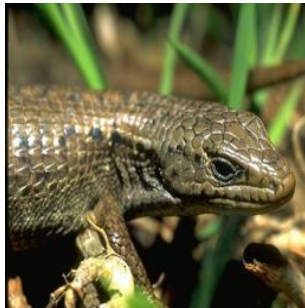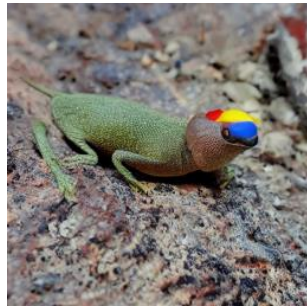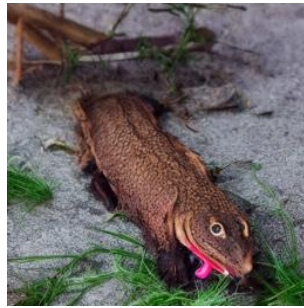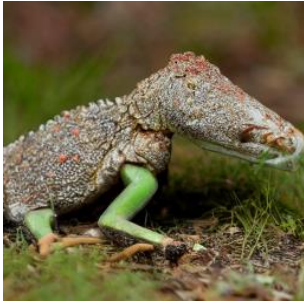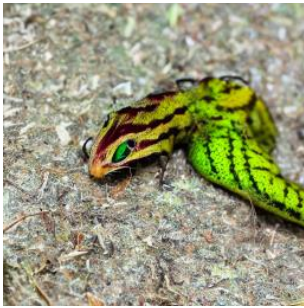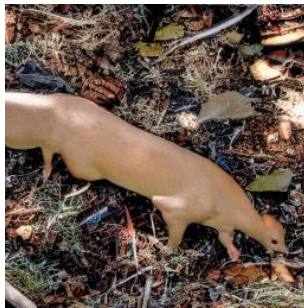

**Strawberry**

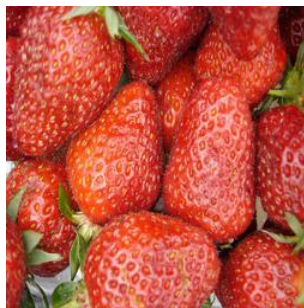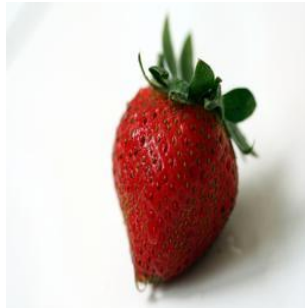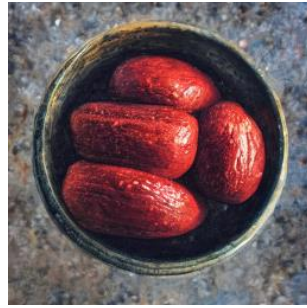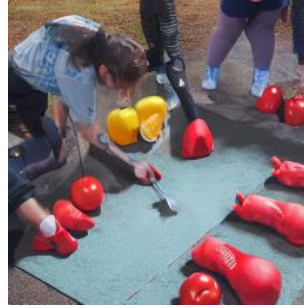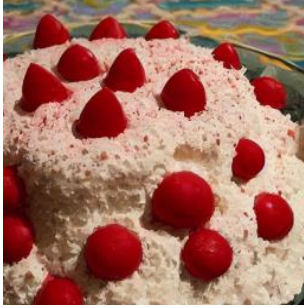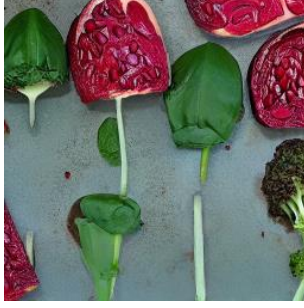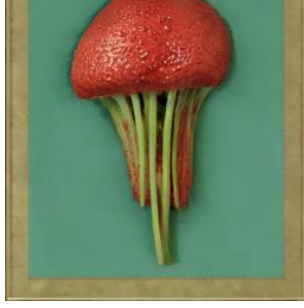

**Keyboard**

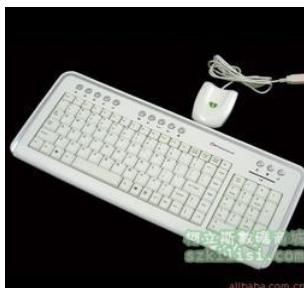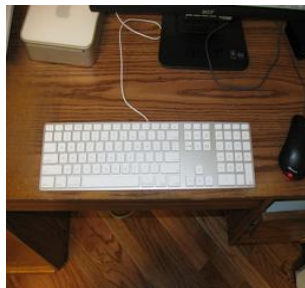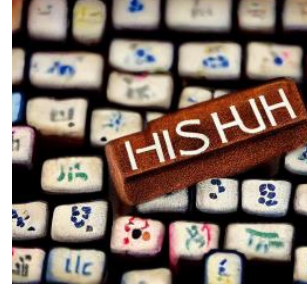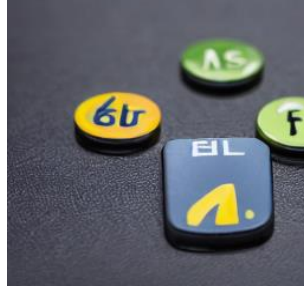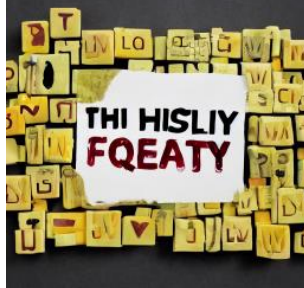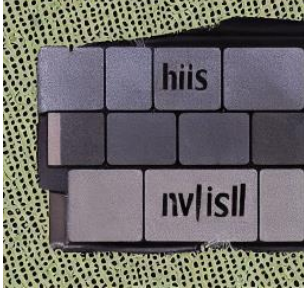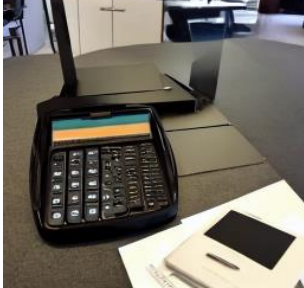

Supplement: supplementary_material [file attachment]

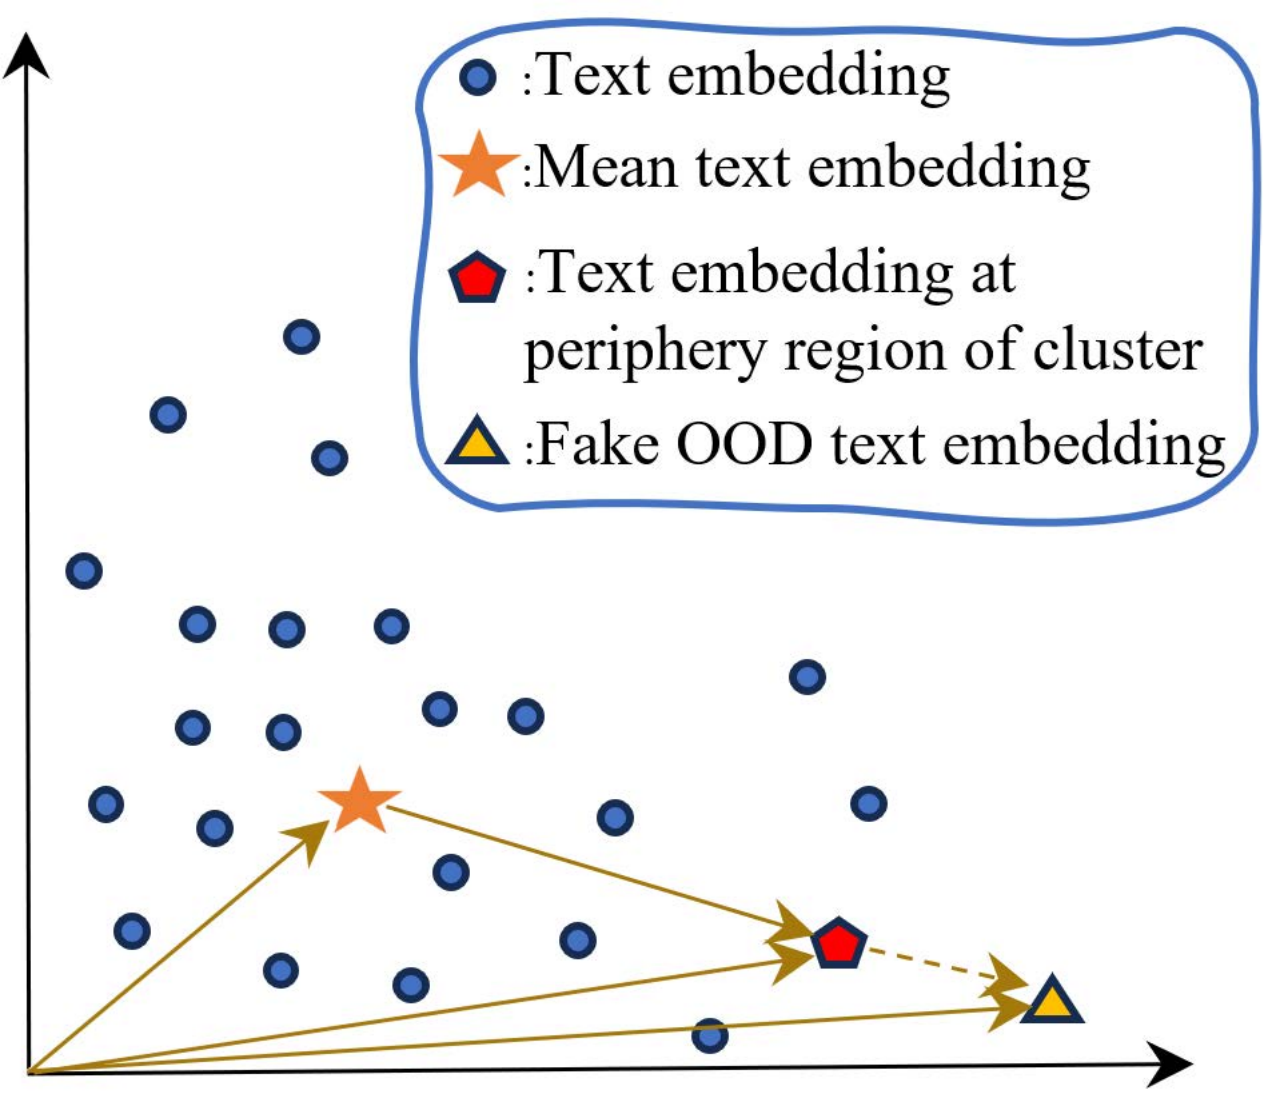

Supplement: supplementary_material [file attachment]

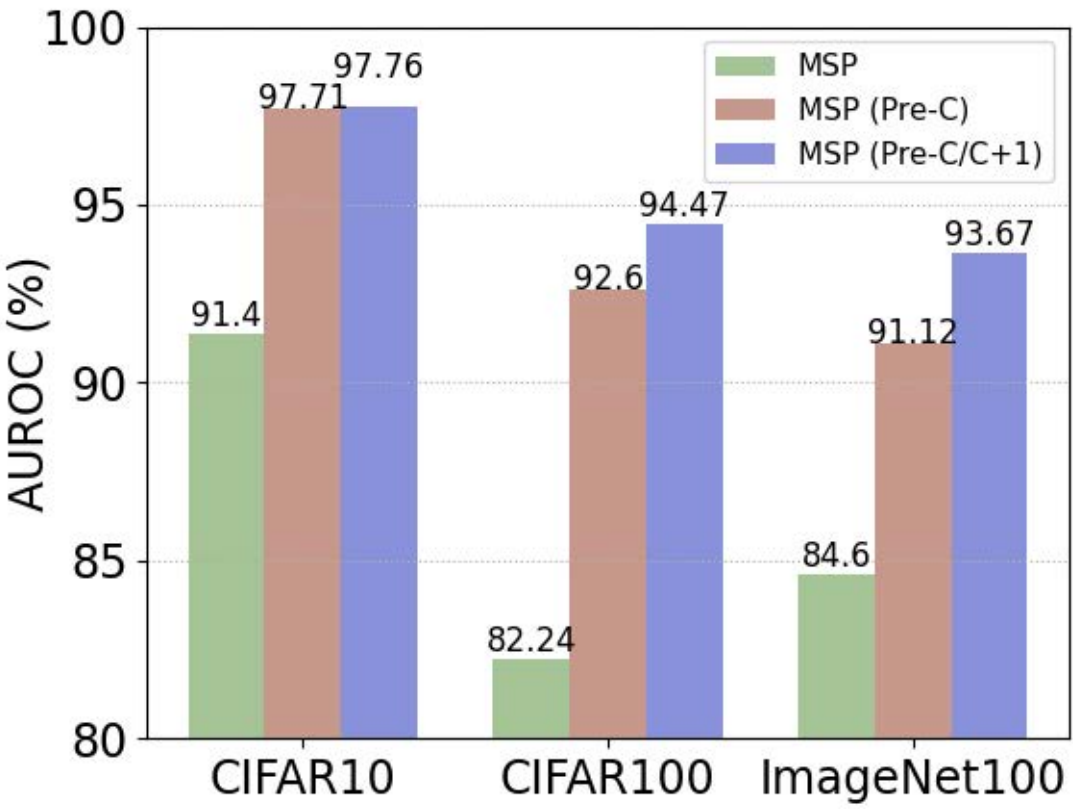

Supplement: supplementary_material [file attachment]

## 1 Fake Image Generation

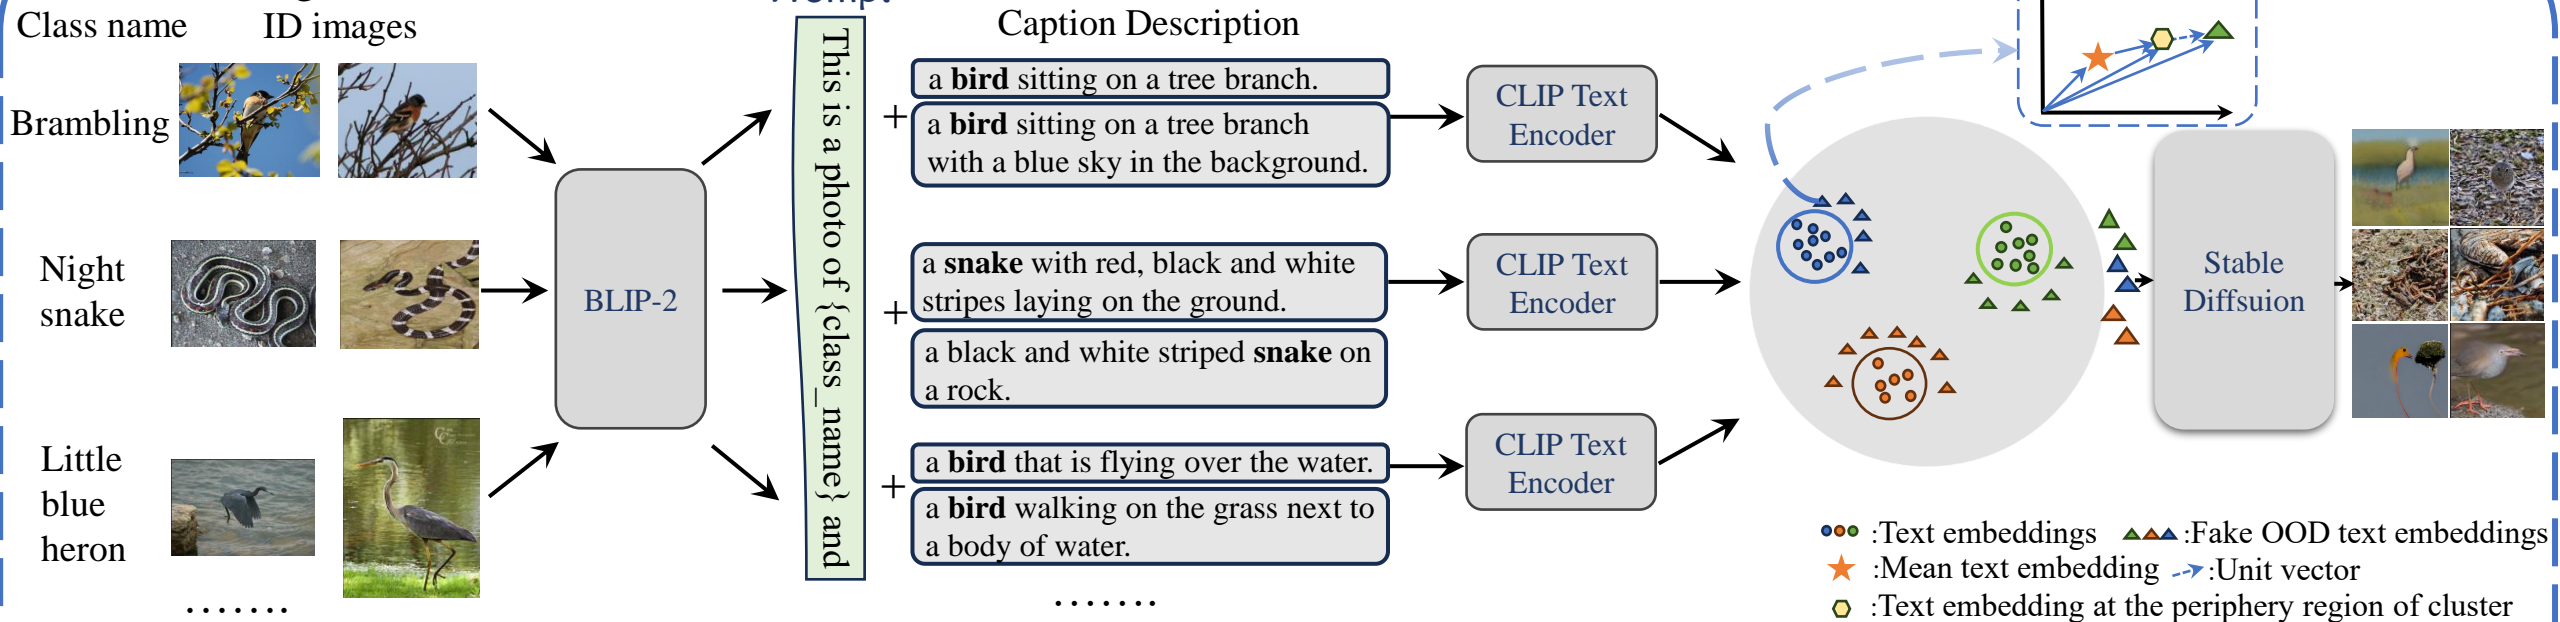

## 2 Background Image Generation

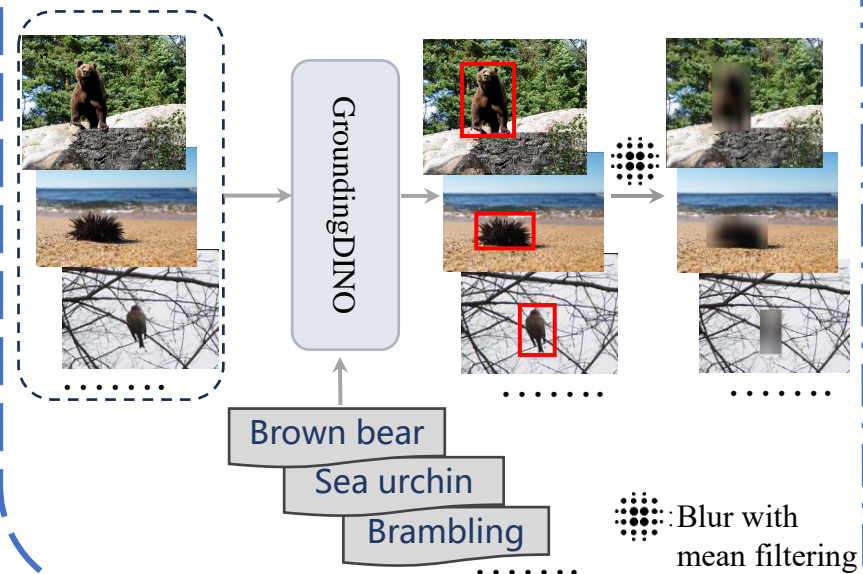

## 3 Training

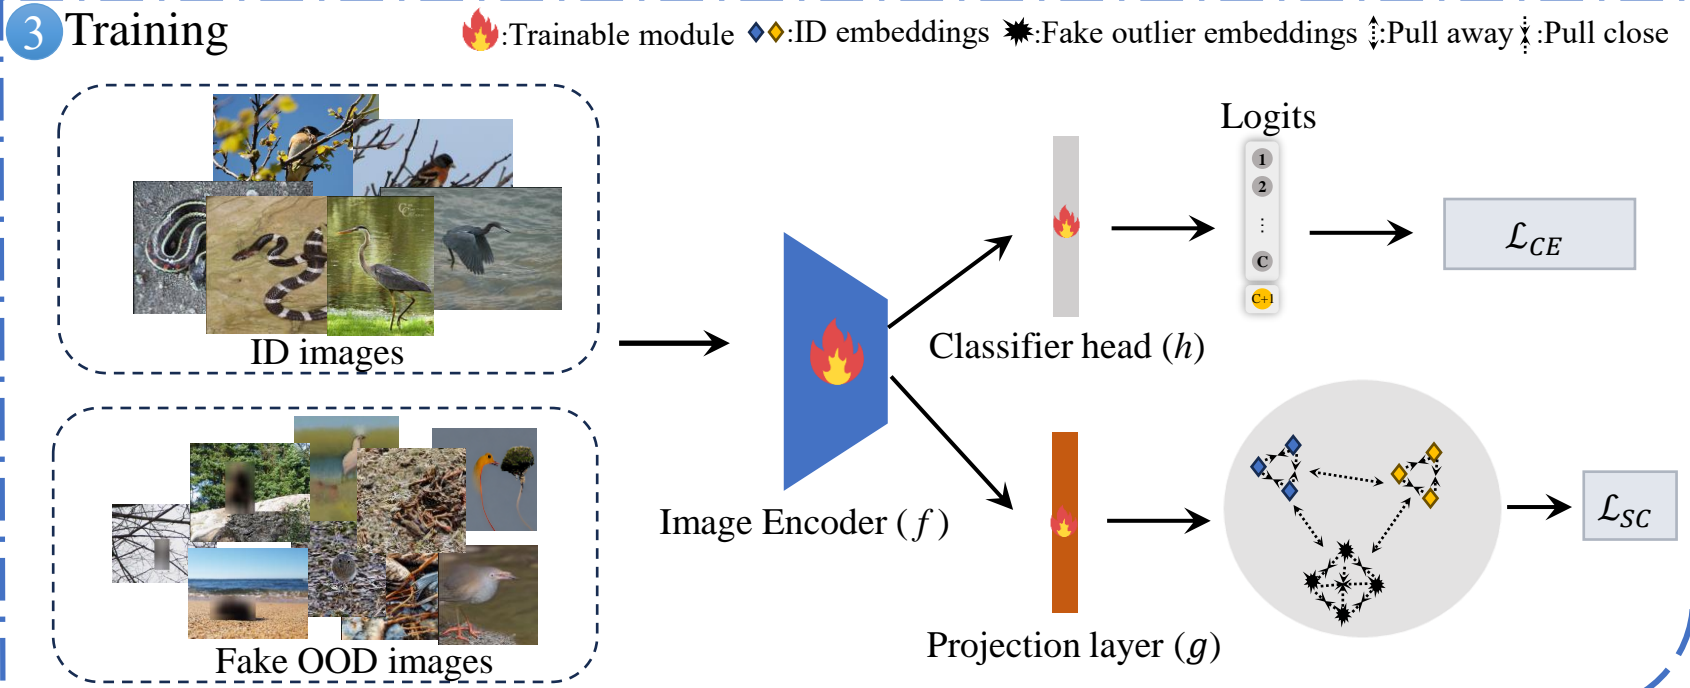

Supplement: supplementary_material [file attachment]

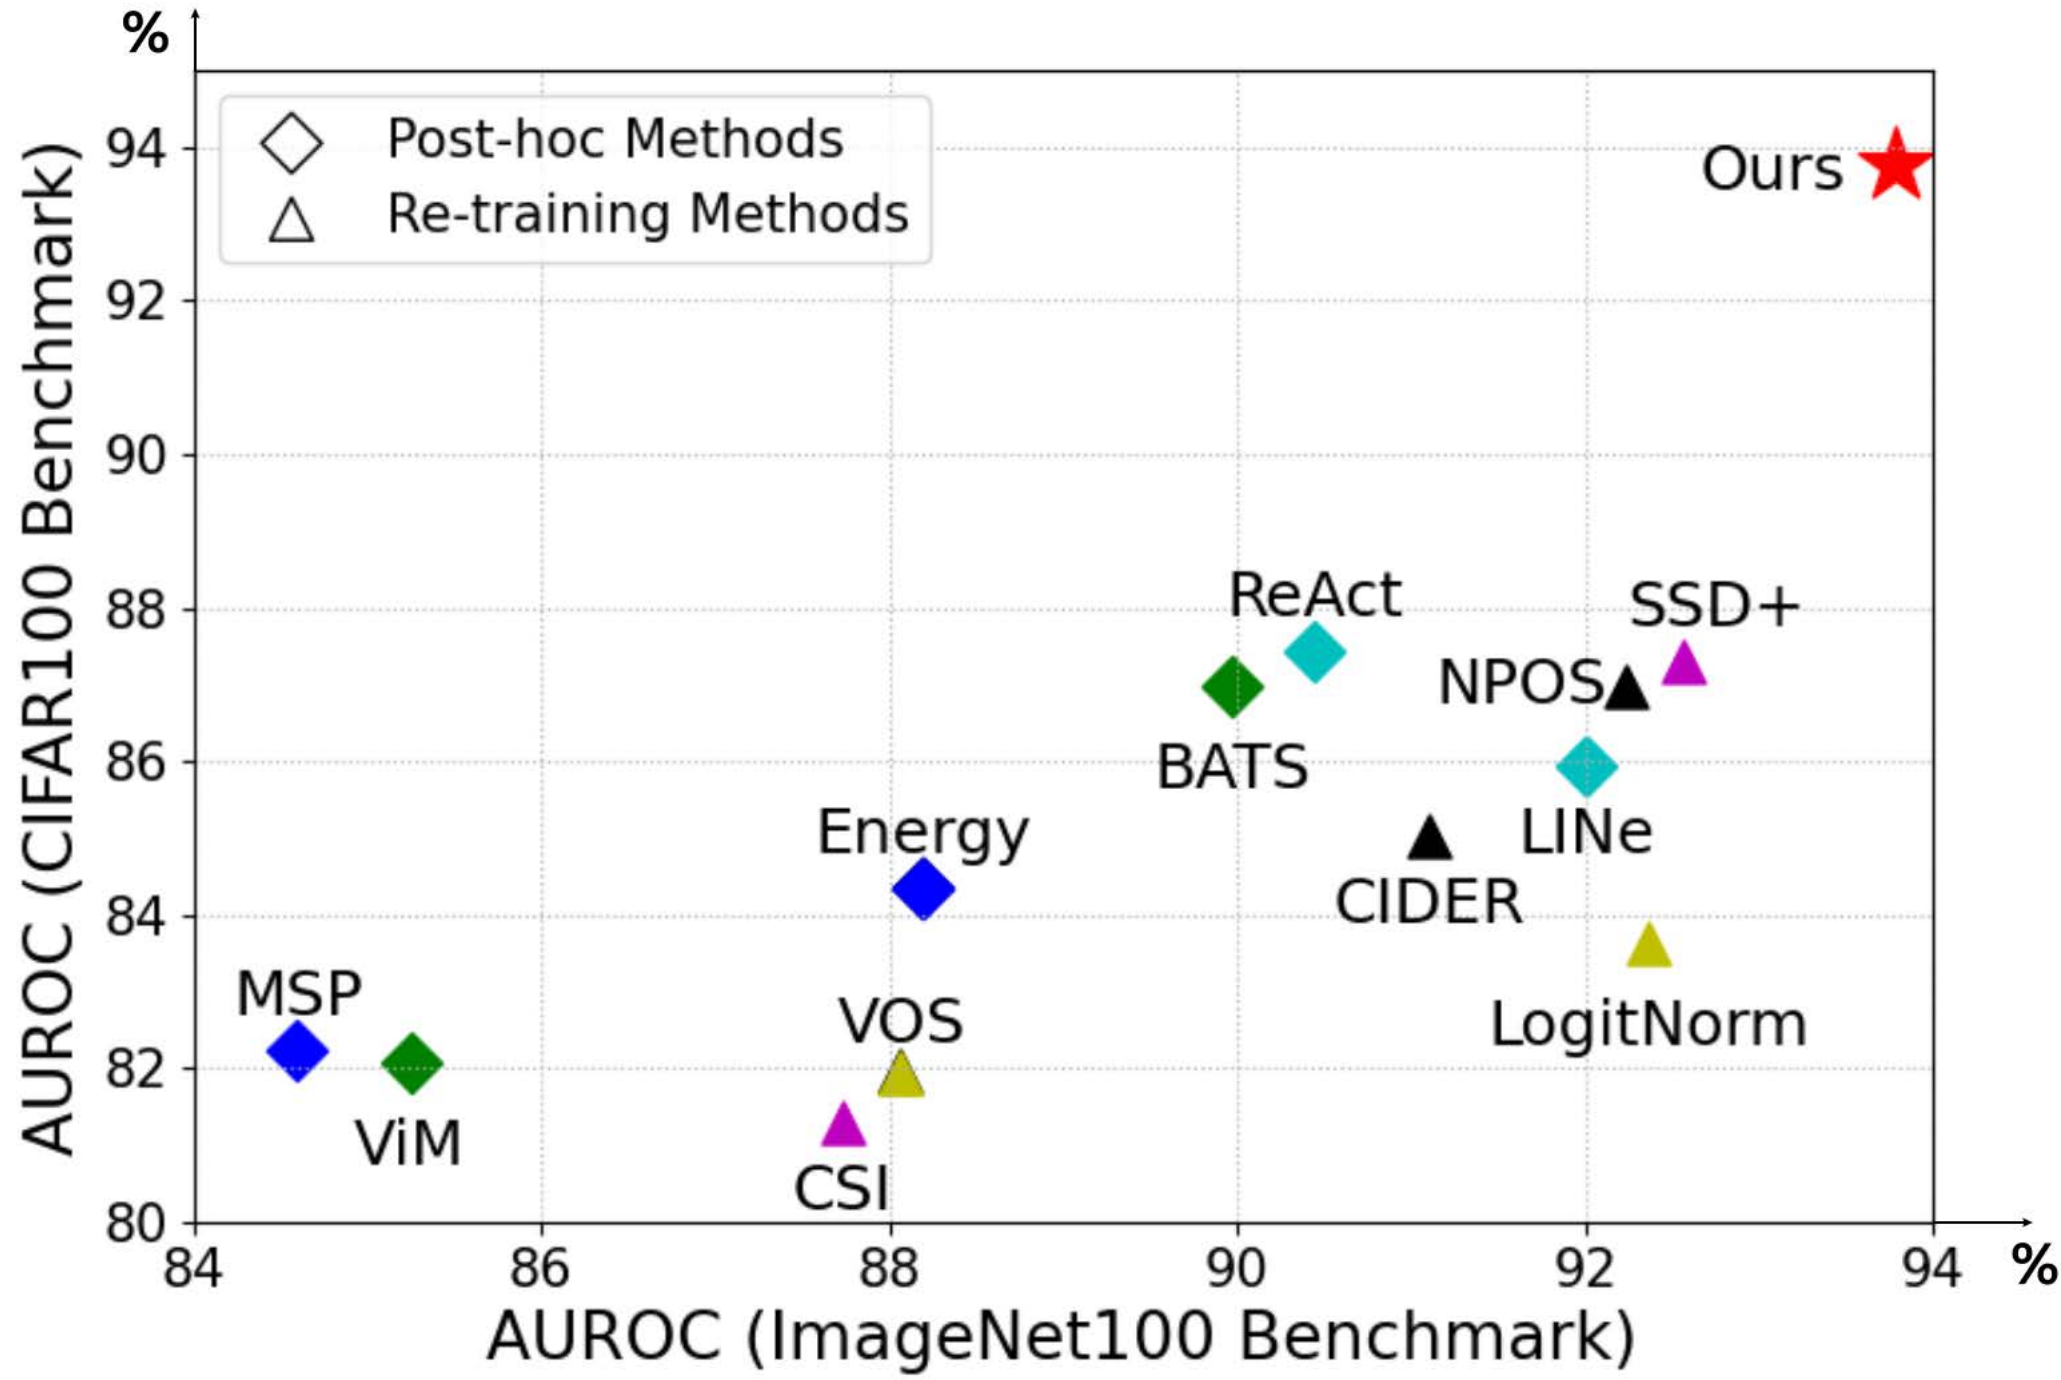

Supplement: supplementary_material [file attachment]

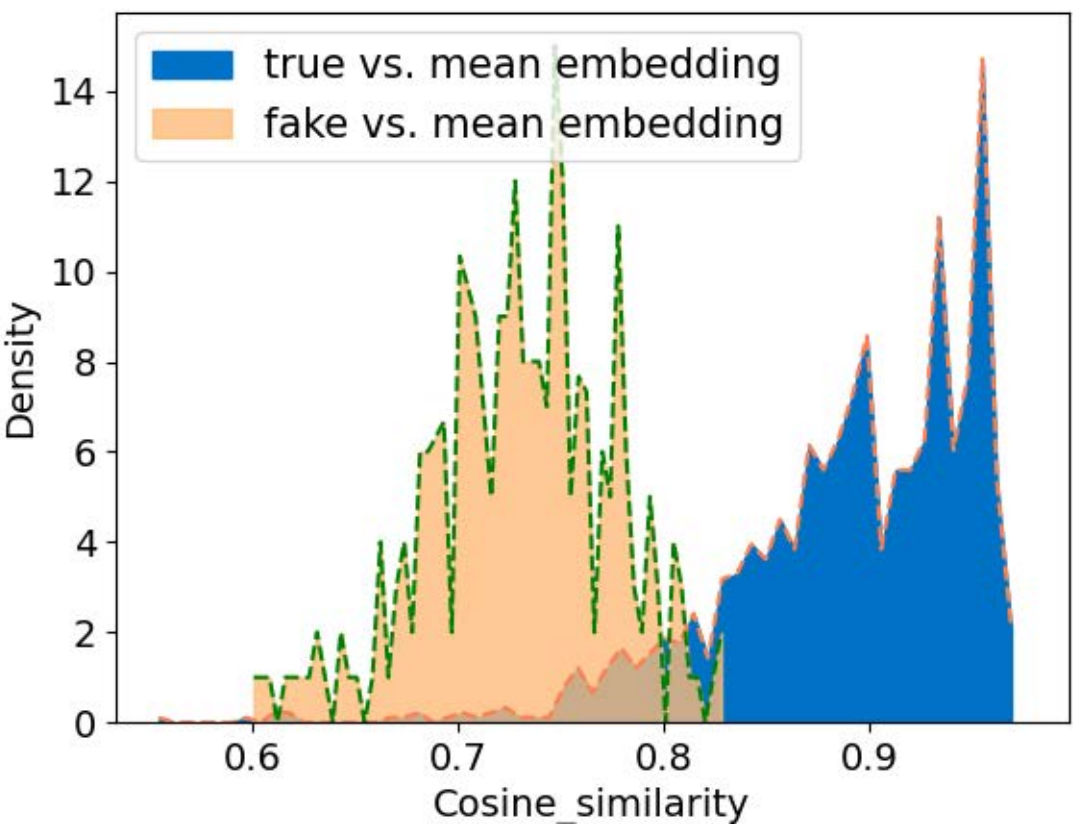

Supplement: supplementary_material [file attachment]
